# Supplementary material for: Ultradeep hydrodesulfurization of fuel over superior NiMoS phases constructed by a novel Ni(MoS4)2(C13H30N)2 precursor
Source: Royal Society of Chemistry journal article supplement (doi:10.1039/d0cy01177k), 2020-01-01
Supplement: d0cy01177k1.pdf [file d0cy01177k1.pdf]

## Supplementary Information

Ultradeep hydrodesulfurization of fuel over superior NiMoS phases  
constructed by novel  $\text{Ni}(\text{MoS}_4)_2(\text{C}_{13}\text{H}_{30}\text{N})_2$  precursor

Jundong Xu, Chenglong Wen, Shuisen He, Yu Fan\*

State Key Laboratory of Heavy Oil Processing, China University of Petroleum,  
Beijing 102249, P.R. China

---

\* Corresponding author. Tel.: +86 10 89734981; fax: +86 10 89734979.

E-mail address: [fanyu@cup.edu.cn](mailto:fanyu@cup.edu.cn) (Y. Fan)

**Table S1** Properties of FCC diesel.

| Item                                                            | Value |
|-----------------------------------------------------------------|-------|
| Density (20 °C) (g·cm <sup>-3</sup> )                           | 0.856 |
| Sulfur (μg·g <sup>-1</sup> )                                    | 3640  |
| Kinematic viscosity (20 °C) (mm <sup>2</sup> ·s <sup>-1</sup> ) | 5.39  |
| Cetane number                                                   | 39    |
| Distillation (ASTM D86) (°C)                                    |       |
| IBP                                                             | 210   |
| 10%                                                             | 249   |
| 50%                                                             | 296   |
| 90%                                                             | 342   |
| FBP                                                             | 363   |



The typical HRTEM images of s-NiMo/ $\gamma$ -Al<sub>2</sub>O<sub>3</sub>-DE and s-NiMo/ $\gamma$ -Al<sub>2</sub>O<sub>3</sub>-D are shown in Fig. S1. Most of MoS<sub>2</sub> slabs on s-NiMo/ $\gamma$ -Al<sub>2</sub>O<sub>3</sub>-DE (Fig. S1a) have the same length and stacking layer number as those of s-NiMo/ $\gamma$ -Al<sub>2</sub>O<sub>3</sub>-D (Fig. S1b). In addition, s-NiMo/ $\gamma$ -Al<sub>2</sub>O<sub>3</sub>-DE has almost the same distributions of lengths (Fig. S1c) and stacking layer numbers (Fig. S1d) of the MoS<sub>2</sub> slabs as those of s-NiMo/ $\gamma$ -Al<sub>2</sub>O<sub>3</sub>-D.

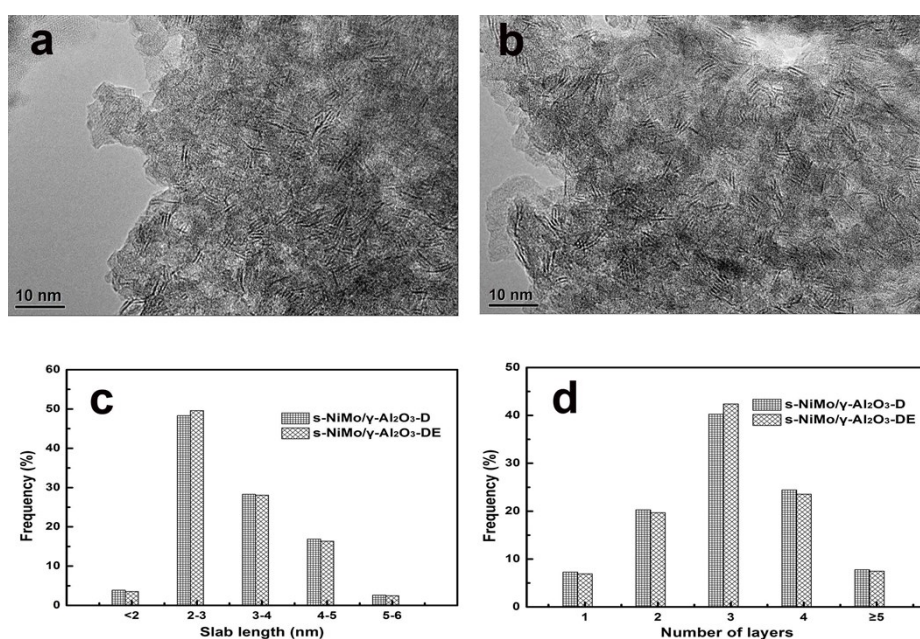

**Fig. S1.** HRTEM images of s-NiMo/ $\gamma$ -Al<sub>2</sub>O<sub>3</sub>-DE (a), s-NiMo/ $\gamma$ -Al<sub>2</sub>O<sub>3</sub>-D (b); statistical distributions of the lengths (c) and stacking numbers (d) of MoS<sub>2</sub> slabs on s-NiMo/ $\gamma$ -Al<sub>2</sub>O<sub>3</sub>-DE and s-NiMo/ $\gamma$ -Al<sub>2</sub>O<sub>3</sub>-D.

The reaction rate constants ( $k_{HDS}$ ) and TOF values of s-NiMo/ $\gamma$ -Al<sub>2</sub>O<sub>3</sub>-D (prepared using alumina powder as a support) and s-NiMo/ $\gamma$ -Al<sub>2</sub>O<sub>3</sub>-DE (prepared using alumina extrude as a support) for 4,6-DMDBT HDS are listed in Table S2. s-NiMo/ $\gamma$ -Al<sub>2</sub>O<sub>3</sub>-DE has almost the same  $k_{HDS}$  ( $6.32 \times 10^{-7}$  mol g<sup>-1</sup> s<sup>-1</sup>) and TOF value ( $9.98 \times 10^{-4}$  s<sup>-1</sup>) as those of s-NiMo/ $\gamma$ -Al<sub>2</sub>O<sub>3</sub>-D.

**Table S2** HDS results for 4,6-DMDBT on s-NiMo/ $\gamma$ -Al<sub>2</sub>O<sub>3</sub>-D and s-NiMo/ $\gamma$ -Al<sub>2</sub>O<sub>3</sub>-DE.

| Catalyst                                             | $k_{HDS}$ ( $10^{-7}$ molg <sup>-1</sup> s <sup>-1</sup> ) | TOF $\times 10^4$ (s <sup>-1</sup> ) |
|------------------------------------------------------|------------------------------------------------------------|--------------------------------------|
| s-NiMo/ $\gamma$ -Al <sub>2</sub> O <sub>3</sub> -D  | 6.35                                                       | 10.01                                |
| s-NiMo/ $\gamma$ -Al <sub>2</sub> O <sub>3</sub> -DE | 6.32                                                       | 9.98                                 |
